# Supplementary material
Source: PubMed Central journal article supplement (PMC4852750)
Supplement: NIHMS781767-supplement-cs_16_Benzene_hydroxylation_ESI.pdf [file NIHMS781767-supplement-cs_16_Benzene_hydroxylation_ESI.pdf]

## Electronic Supplementary Information

### **One-Step Selective Hydroxylation of Benzene to Phenol with Hydrogen Peroxide Catalysed by Copper Complexes Incorporated into Mesoporous Silica- Alumina**

**Mihoko Yamada,<sup>a</sup> Kenneth D. Karlin<sup>\*,b</sup> and Shunichi Fukuzumi<sup>\*,acd</sup>**

<sup>a</sup> Dr. M. Yamada, Prof. Dr. S. Fukuzumi

Department of Material and Life Science, Graduate School of Engineering, Osaka University, ALCA and SENTAN, Japan Science and Technology (JST), Suita, Osaka 565-0871 (Japan)

Fax: (+81) 6-6879-7370

E-mail: fukuzumi@chem.eng.osaka-u.ac.jp

<sup>b</sup> Prof. Dr. K. D. Karlin

Department of Chemistry, The Johns Hopkins University, Baltimore, Maryland, 21218, (United States)

<sup>c,d</sup> Prof. Dr. S. Fukuzumi

Department of Chemistry and Nano Science, Ewha Womans University, Seoul 120-750 (Korea)

Faculty of Science and Engineering, Meijo University, ALCA and SENTAN, Japan Science and Technology Agency (JST), Nagoya, Aichi 468-0073 (Japan)

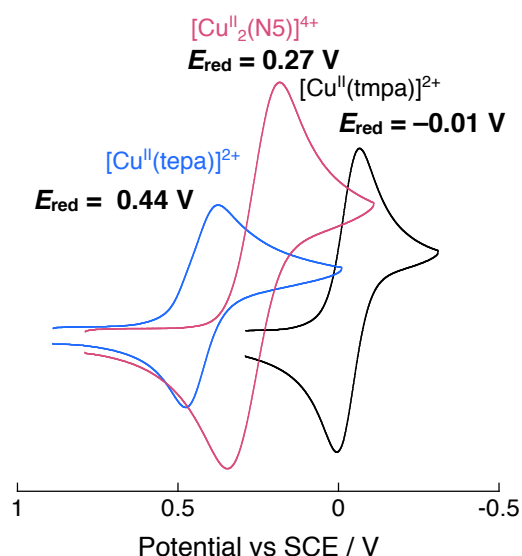

**Figure S1.** Cyclic voltammogram of  $[\text{Cu}^{\text{II}}(\text{tmpa})(\text{CH}_3\text{CN})](\text{ClO}_4)_2$  (1.0 mM),  $[\text{Cu}^{\text{II}}_2(\text{N5})(\text{H}_2\text{O})_2](\text{NO}_3)_4$  (1.0 mM), and  $[\text{Cu}^{\text{II}}(\text{tepa})(\text{ClO}_4)](\text{ClO}_4)$  (1.0 mM) in deaerated  $\text{CH}_3\text{CN}$  containing  $n\text{-Bu}_4\text{NPF}_6$  (0.10 M) with a platinum disk electrode (i.d. 1.6 mm) at 298 K. Scan rate:  $100 \text{ mV s}^{-1}$ .

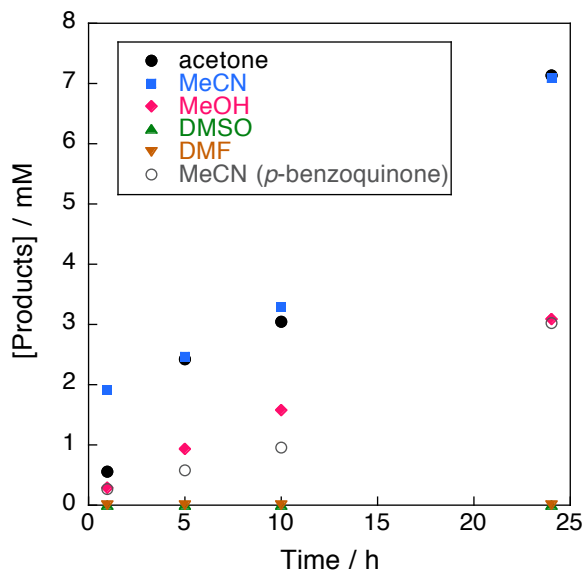

**Figure S2.** Time profiles of formation of phenol or *p*-benzoquinone in the hydroxylation of benzene with 30 wt% aqueous  $\text{H}_2\text{O}_2$  and a catalytic amount of **1** at 298 K in various solvents (4.75 ml). Symbols correspond as follows: Solid circle, acetone; solid square, acetonitrile; pink diamond, MeOH; green triangle, DMSO; orange inverted triangle, DMF; grey open circle, acetonitrile (*p*-benzoquinone). The concentrations are  $[\text{C}_6\text{H}_6] = 2.1 \text{ M}$ ,  $[\text{H}_2\text{O}_2] = 2.1 \text{ M}$  and  $[[\text{Cu}^{\text{II}}(\text{tmpa})]^{2+}] = 67 \text{ }\mu\text{M}$  in 4.75 ml of the starting solutions.

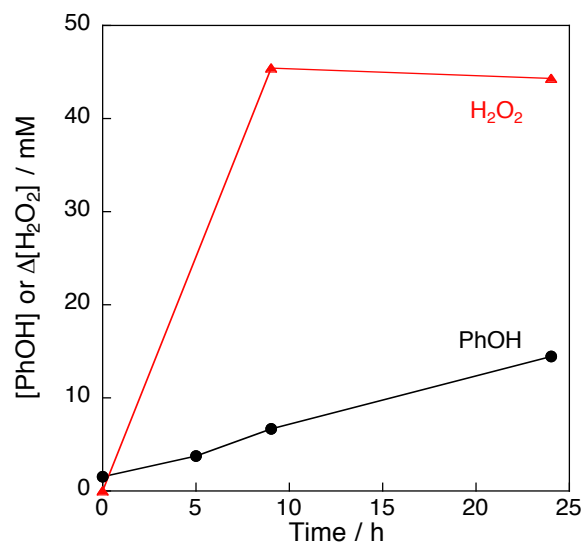

**Figure S3.** Time profiles of formation of phenol (black circle) and consumption of H<sub>2</sub>O<sub>2</sub> (red triangle) in the hydroxylation of benzene with 30 wt% aqueous H<sub>2</sub>O<sub>2</sub> with a Cu(II) complex catalyst **1** in acetone at 298 K. The concentrations are [C<sub>6</sub>H<sub>6</sub>] = 2.1 M, [H<sub>2</sub>O<sub>2</sub>] = 0.6 M and [[Cu<sup>II</sup>(tmpa)]<sup>2+</sup>] = 200 μM in 4.75 ml of the starting solution.

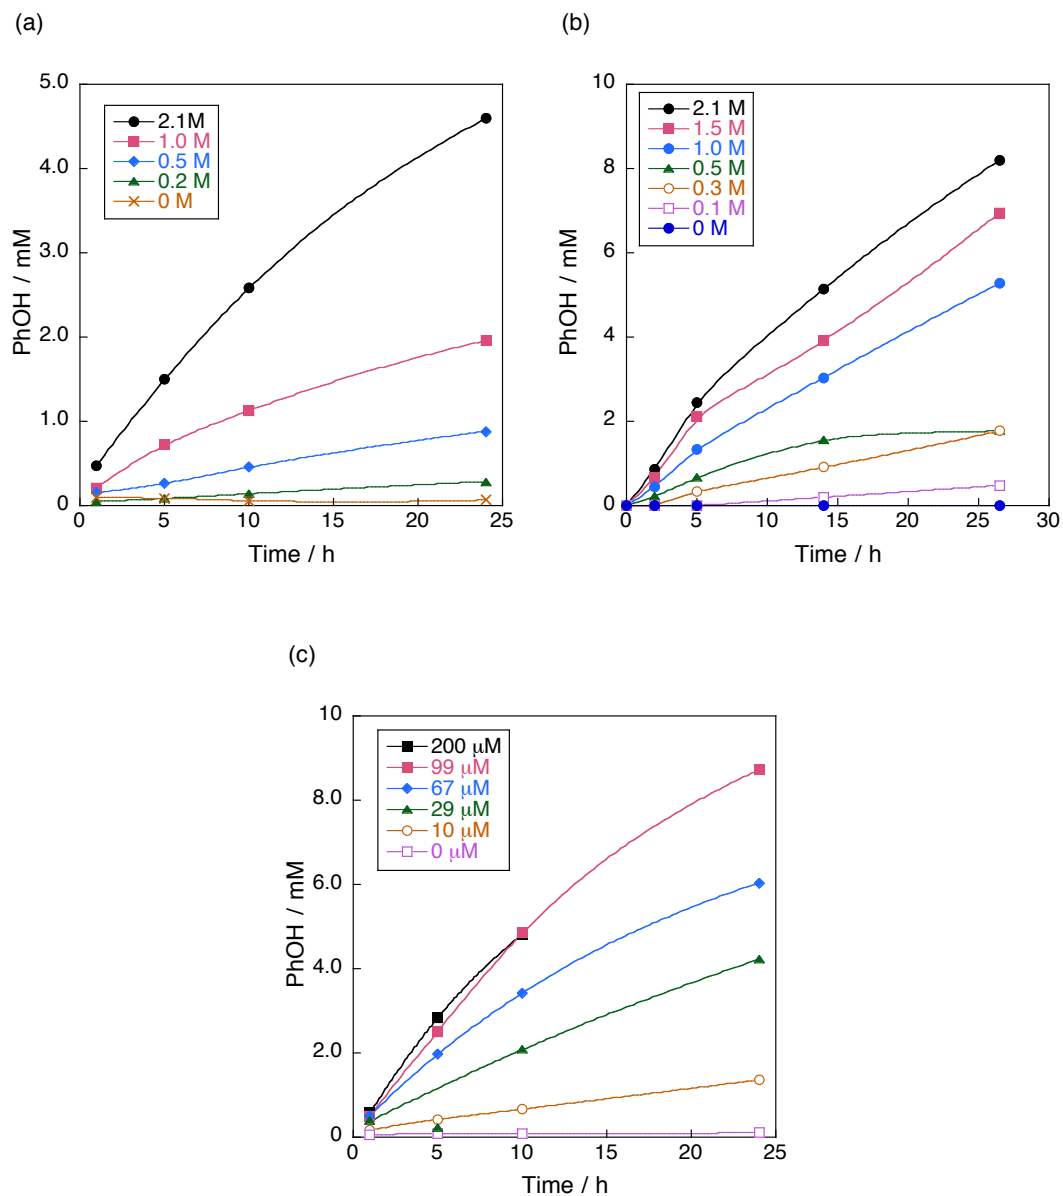

**Figure S4.** Time profiles of formation of phenol in the hydroxylation of benzene (a) with various amounts of  $\text{H}_2\text{O}_2$  (0, 0.2, 0.5, 1.0, 2.1 M) with **1** and 1.0 M  $\text{C}_6\text{H}_6$ , (b) from various amounts of benzene (0, 0.1, 0.3, 0.5, 1.0, 1.5, 2.1 M) with  $\text{H}_2\text{O}_2$  and with **1**, and (c) with various amounts of **1** (0, 10, 29, 67, 99, 200  $\mu\text{M}$ ) The concentrations are  $[\text{C}_6\text{H}_6] = 2.1 \text{ M}$ ,  $[\text{H}_2\text{O}_2] = 2.1 \text{ M}$ ,  $[\text{H}_2\text{O}] = 8.4 \text{ M}$  and  $[\text{Cu}^{\text{II}}(\text{tmpa})]^{2+} = 67 \mu\text{M}$  in acetone (4.75 ml) at 298 K unless otherwise noted.

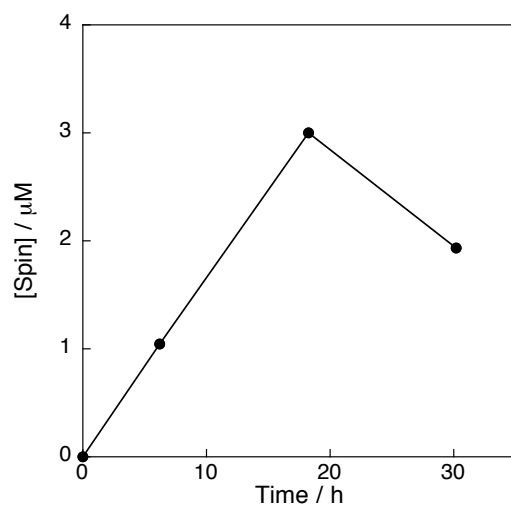

**Figure S5.** Time profiles of the spin concentration determined by comparing with a reference 2,2-diphenyl-1-picrylhydrazyl radical produced in an acetone solution of benzene, 30 wt% aqueous  $\text{H}_2\text{O}_2$  and **1** with DMPO at 298 K. The concentrations are  $[\text{C}_6\text{H}_6] = 2.1 \text{ M}$ ,  $[\text{H}_2\text{O}_2] = 2.1 \text{ M}$ ,  $[\text{H}_2\text{O}] = 0.4 \text{ M}$ ,  $[[\text{Cu}^{\text{II}}(\text{tmpa})]^{2+}] = 67 \mu\text{M}$  and  $[\text{DMPO}] = 5.4 \text{ mM}$  in acetone (4.75 ml).

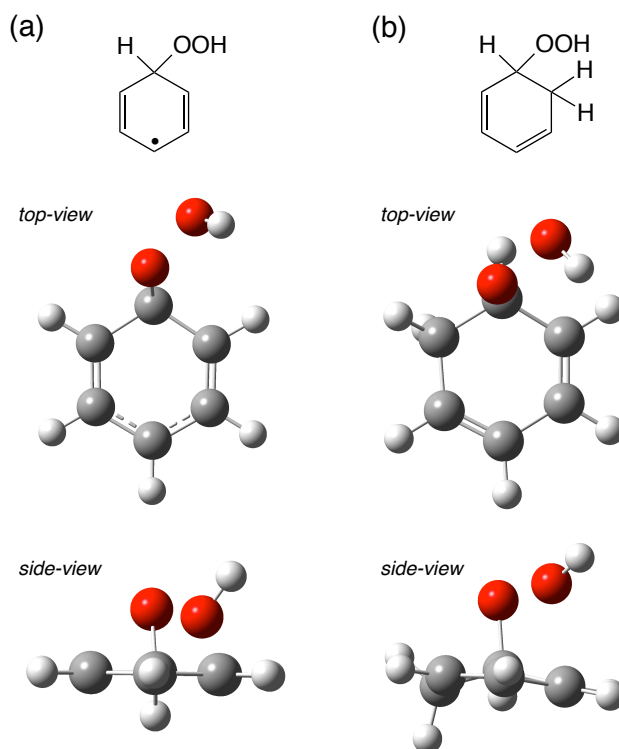

**Figure S6.** Structural formulas and optimised structures of (a) an OOH-adduct radical and (b) hydrogen-transferred OOH-adduct transition state calculated by a DFT method at the B3LYP/6-31++G(d) level.

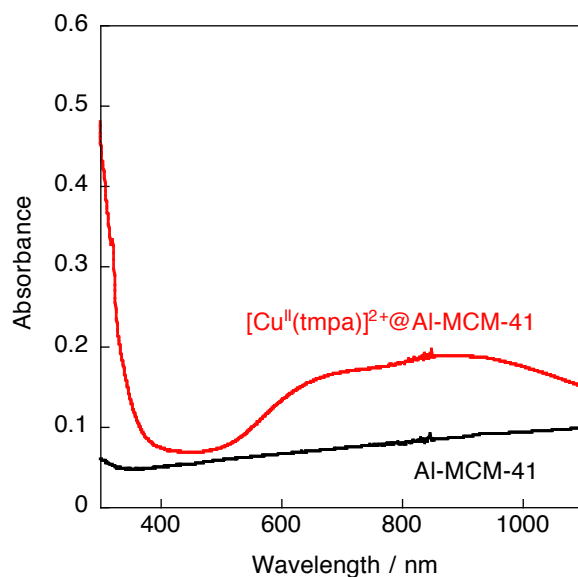

**Figure S7.** UV-vis diffuse reflectance spectra of  $[\text{Cu}(\text{tmpa})]^{2+}@ \text{Al-MCM-41}$  (red line) and Al-MCM-41 (black line)

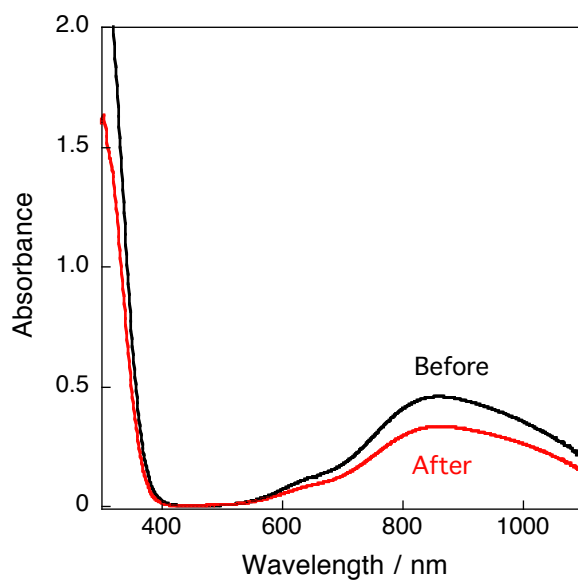

**Figure S8.** UV-vis absorption spectra of the mother liquid containing  $[\text{Cu}(\text{tmpa})]^{2+}$  before and after stirring with Al-MCM-41 (300 mg) in acetonitrile at 298 K. The initial conditions are  $[[\text{Cu}(\text{tmpa})]^{2+}] = 1.85 \text{ mM}$  in acetonitrile (15 ml) at 298 K.

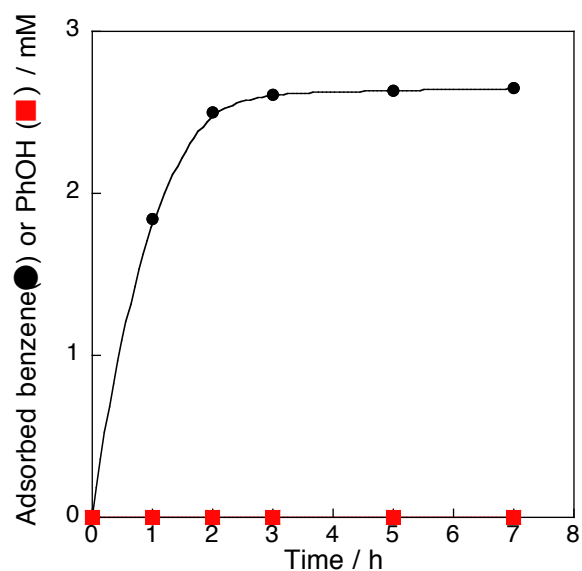

**Figure S9.** Adsorbed benzene and PhOH by Al-MCM-41 (100 mg) in 4.75 ml of an aqueous solution of benzene (5.1 mM) and PhOH (5.0 mM).

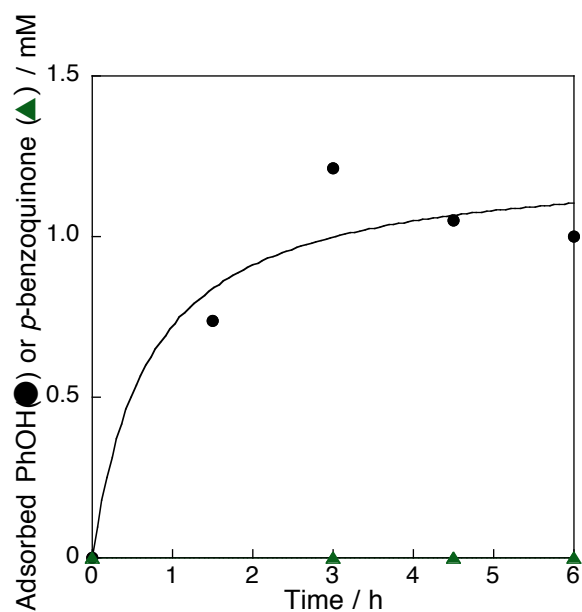

**Figure S10.** Adsorbed benzene by Al-MCM-41 (50 mg) in 5.0 ml of an acetone/H<sub>2</sub>O 4:1 mixed solution of benzene (5.0 mM), and adsorbed PhOH by Al-MCM-41 (50 mg) in 5.0 ml of an acetone/H<sub>2</sub>O 4:1 mixed solution of PhOH (5.0 mM). The concentration is [H<sub>2</sub>O] = 8.4 M is the same as found in the reaction conditions.

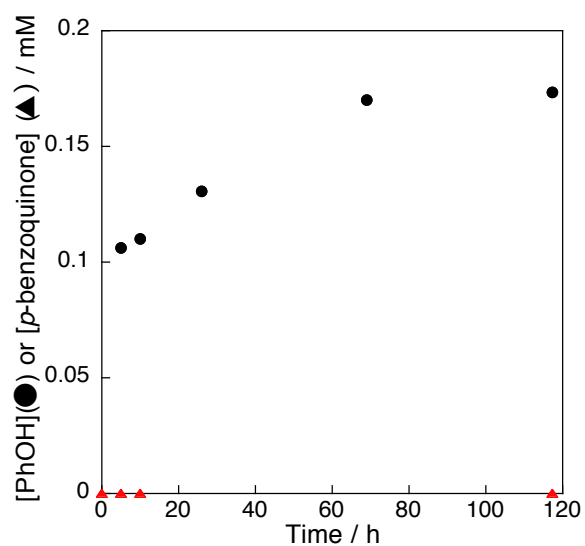

**Figure S11.** Time profiles of formation of phenol (black solid circle) and *p*-benzoquinone (red solid triangle) in the hydroxylation of benzene with 30 wt% aqueous H<sub>2</sub>O<sub>2</sub> and [Cu<sup>II</sup>(tmpa)]<sup>2+</sup>@Al-MCM-41 at 298 K in acetone (4.75 ml). The concentrations are [C<sub>6</sub>H<sub>6</sub>] = 1.0 mM, [H<sub>2</sub>O<sub>2</sub>] = 2.1 M and [[Cu<sup>II</sup>(tmpa)]<sup>2+</sup>] = 200 μM.



**Table S1. Energy of compounds calculated by DFT method at the B3LYP/6-31++G(d) level.**

| Compounds | Energy (au) | Compounds | Energy (au) |
|-----------|-------------|-----------|-------------|
| 1         | -150.9105   | 5         | -383.7789   |
| 2         | -232.2590   | 6         | -76.4227    |
| 3         | -383.1519   | 7         | -307.4805   |
| 4         | -151.5465   |           |             |

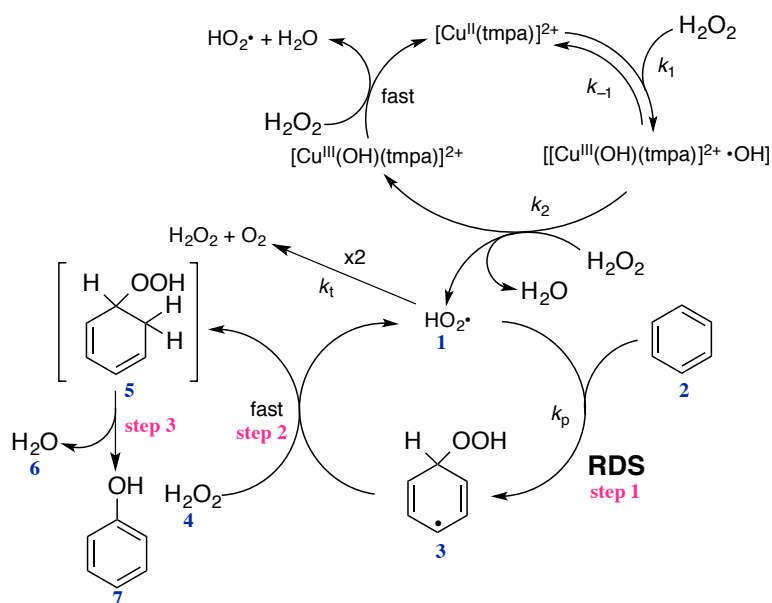

**Table S2. Stabilisation energy of each step calculated from results of DFT calculations (1 au = 627.509 kcal mol<sup>-1</sup>).**

| Step | Initial state<br>(kcal mol <sup>-1</sup> ) | Final state<br>(kcal mol <sup>-1</sup> ) | Stabilisation energy<br>(kcal mol <sup>-1</sup> ) |
|------|--------------------------------------------|------------------------------------------|---------------------------------------------------|
| 1    | -240442.5                                  | -240431.4                                | -11.1                                             |
| 2    | -335528.3                                  | -335522.7                                | -5.6                                              |
| 3    | -240824.92                                 | -240902.9                                | 77.9                                              |
